# Supplementary material
Source: MDPI journal article supplement (https://www.mdpi.com/2073-4344/12/11/1351)
Supplement: s1 [file s1]

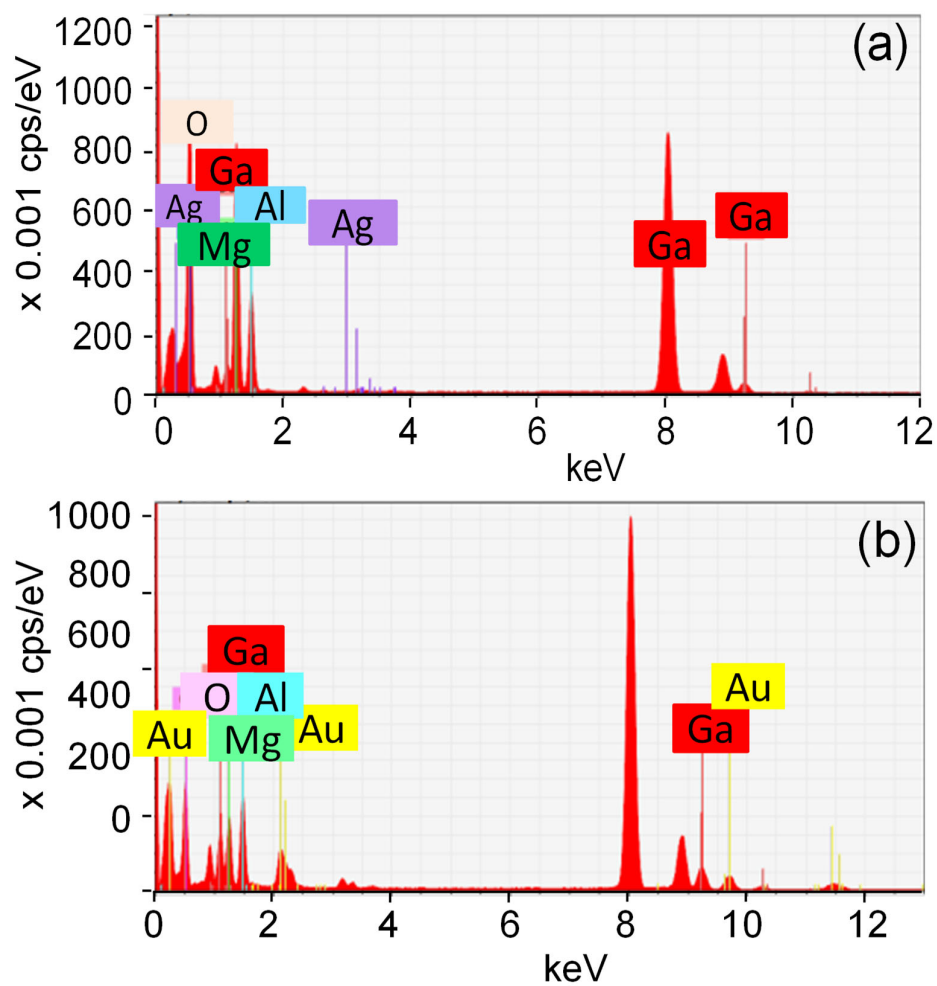

**Figure S1.** EDS analysis for (a) Ag\_MgGaAl and (b) Au\_MgGaAl catalysts

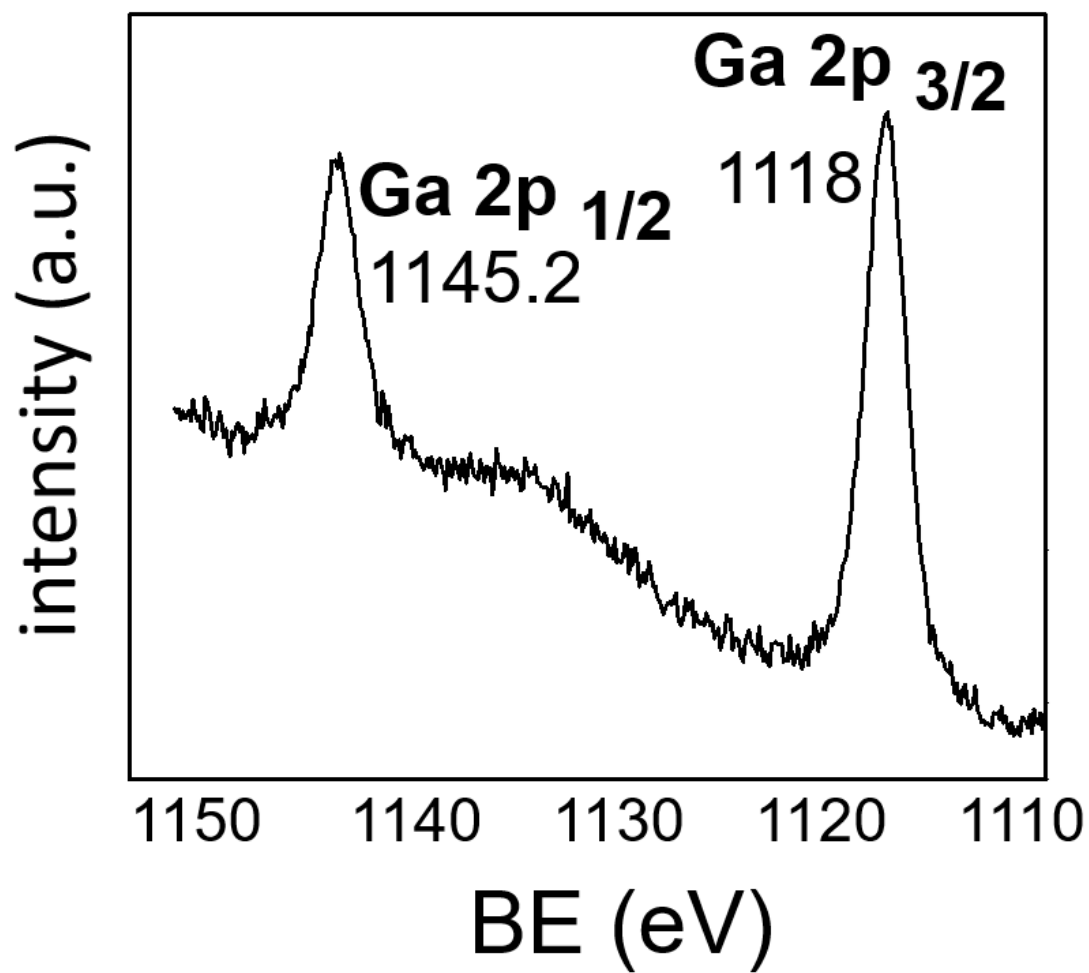

**Figure S2.** High resolution XPS spectra of Ga2p in both Ag\_MgGaAl and Au\_MgGaAl catalysts.

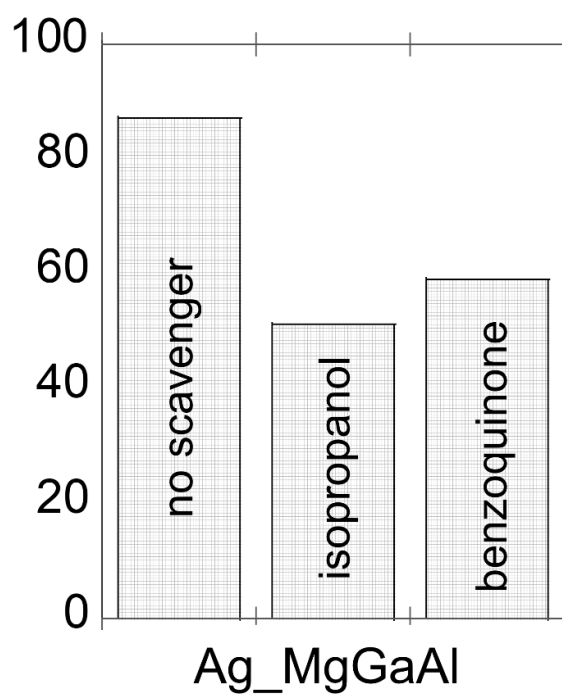

**Figure S3.** Effect of different scavengers on the degradation of 4-NP in the presence of Ag-MgGaAl.
